# Supplementary material for: The chemokine receptor CCR6 facilitates the onset of mammary neoplasia in the MMTV-PyMT mouse model via recruitment of tumor-promoting macrophages
Source: Springer Nature journal article supplement (doi:10.1186/s12943-015-0394-1), 2015-06-05
Supplement: MOESM1 [file 9763140]

**Boyle, ST *et al.* The chemokine receptor CCR6 facilitates the onset of mammary neoplasia in the MMTV-PyMT mouse model via recruitment of tumor-promoting macrophages.**

**Additional File 1:  
Supplementary Figures S1-S5**

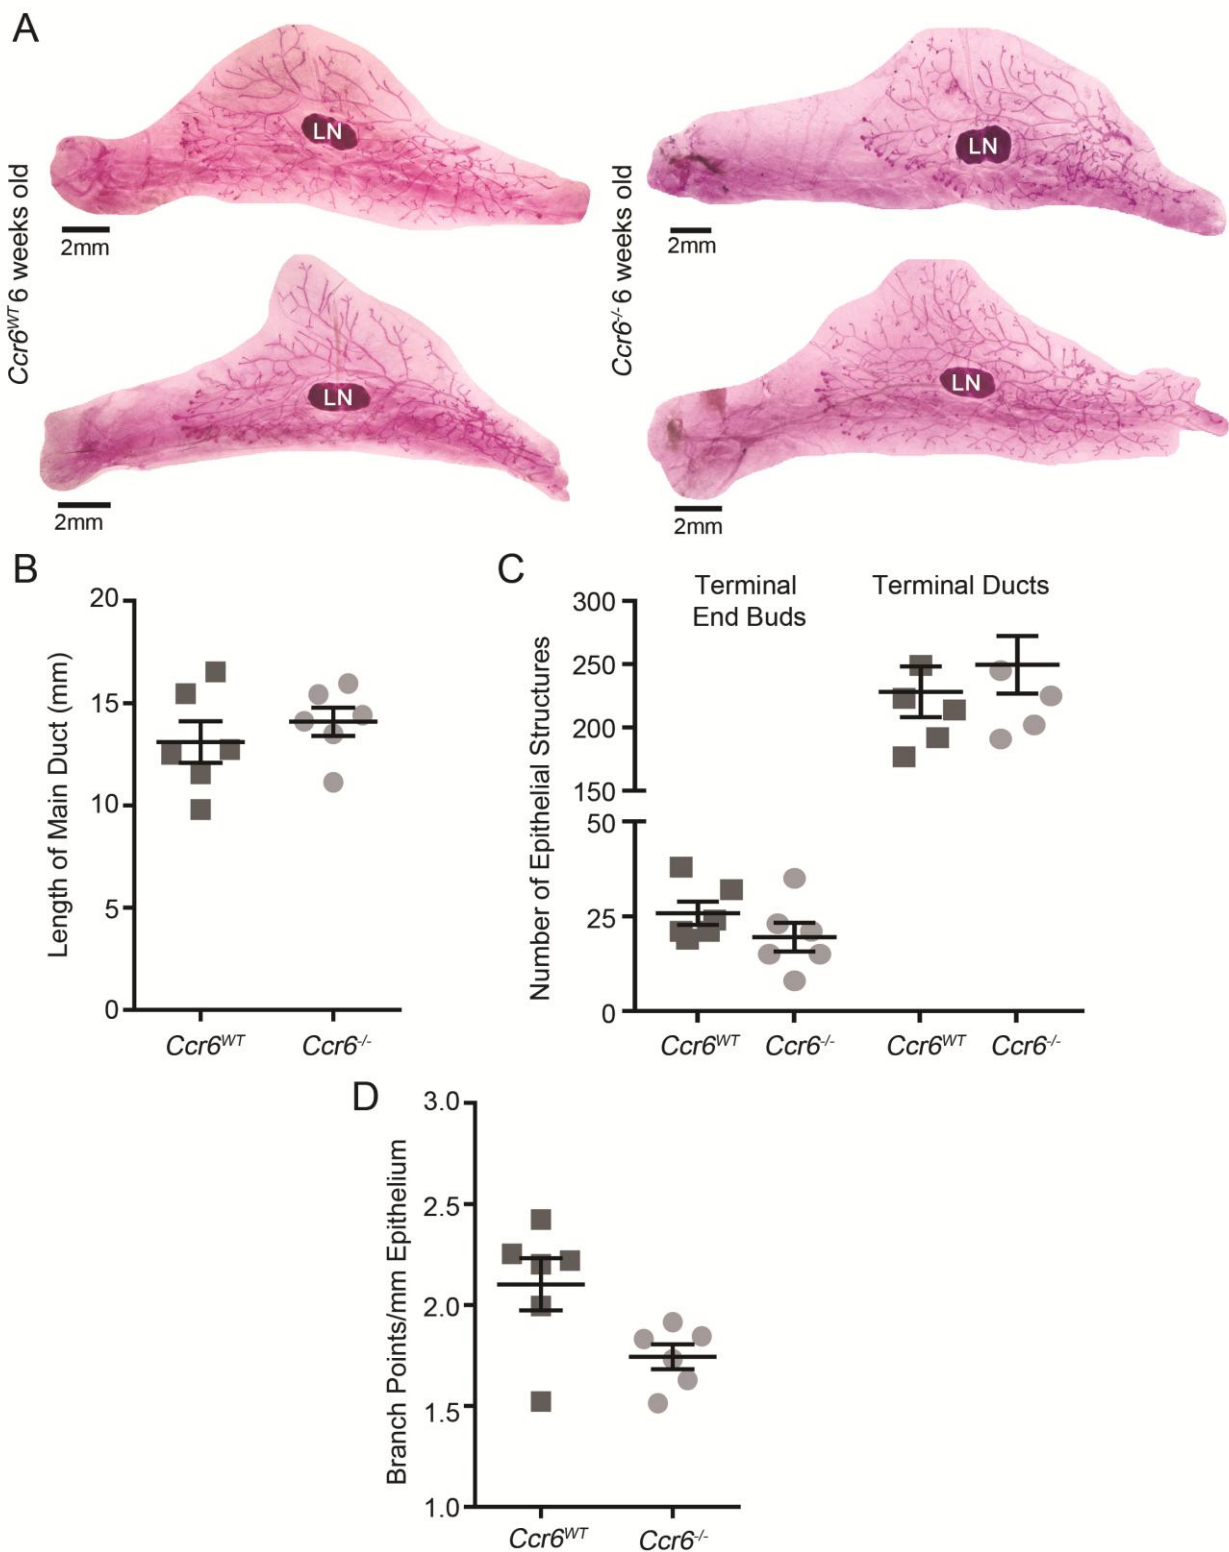

**Figure S1: The role of CCR6 in normal mammary development**

(a) Representative whole mount images of *Ccr6*<sup>WT</sup> (n=6) and *Ccr6*<sup>-/-</sup> (n=6) mice at 6 weeks of age showing development of mammary epithelium. LN=lymph node. (b-d) Quantitation of epithelial growth, by length of main duct (b), number of end structures (c) and branching (d).

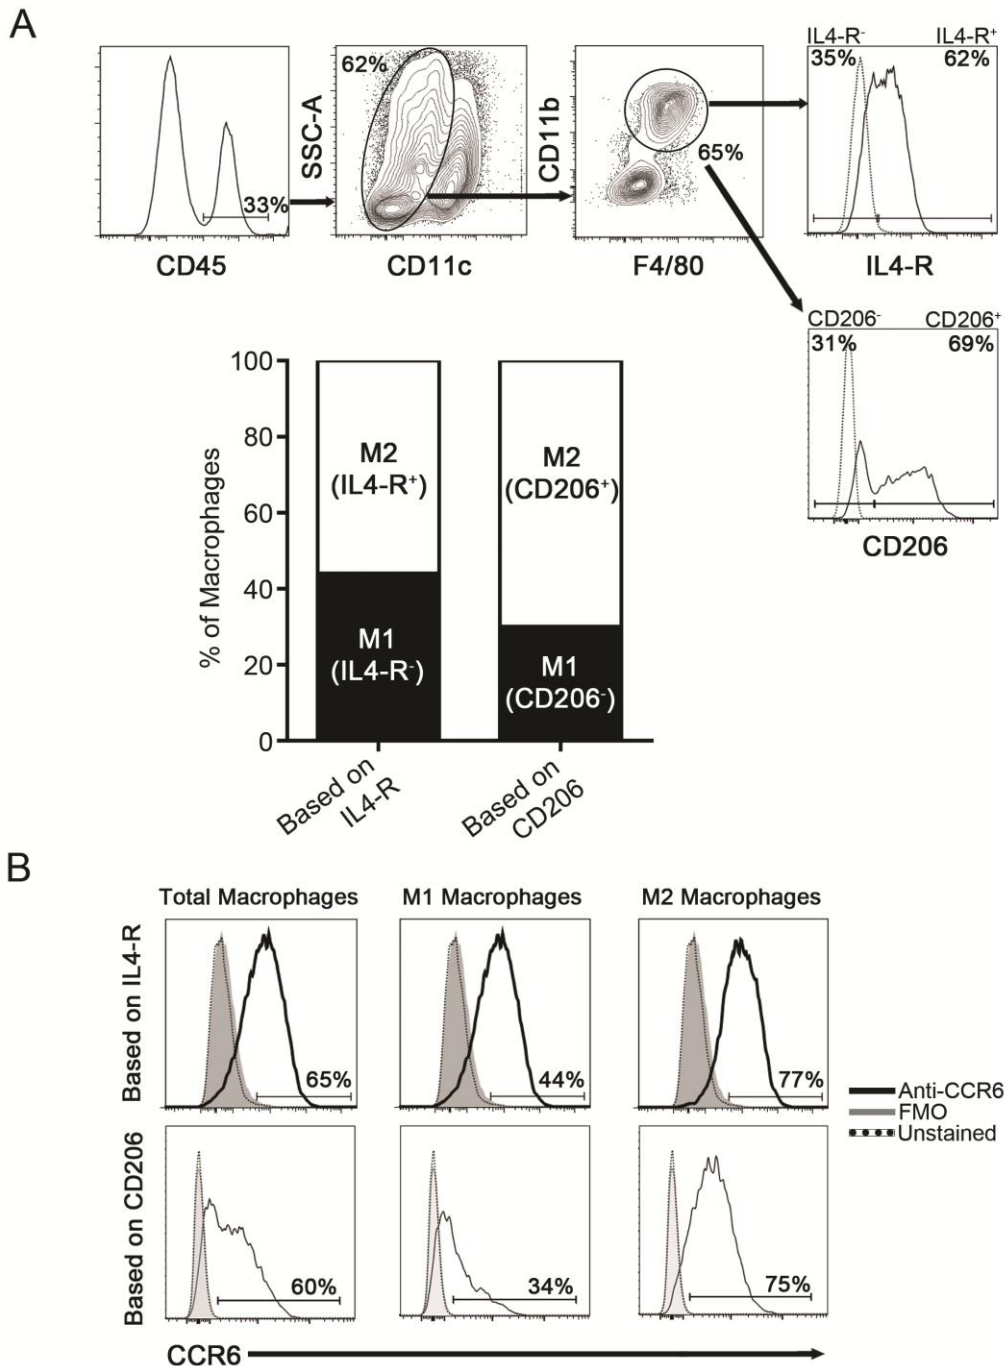

**Figure S2: Analysis of infiltrating macrophages in MMTV-PyMT mammary tumors**  
**(a)** Analysis of M1 anti-tumor and M2 pro-tumor macrophages within the total macrophage population ( $CD45^+CD11c^+CD11b^+F4/80^+$ ), based on IL4-R expression and CD206 expression as indicated, where M1 macrophages are classed as IL4-R or CD206-negative and M2 are IL4-R or CD206-positive. Dotted line=FMO control. M1 and M2 cell proportions (bottom) are presented as percentage of the total macrophage population. **(b)** Representative flow cytometry plots of CCR6 expression within the total, M1 and M2 macrophage populations as based on IL4-R and CD206 (gated as in (a)). **(a-b)** Representative results from 3 independent experiments.

Dendritic Cells: CD45<sup>+</sup>CD11b<sup>+</sup>MHCII<sup>+</sup>CD11c<sup>+</sup>

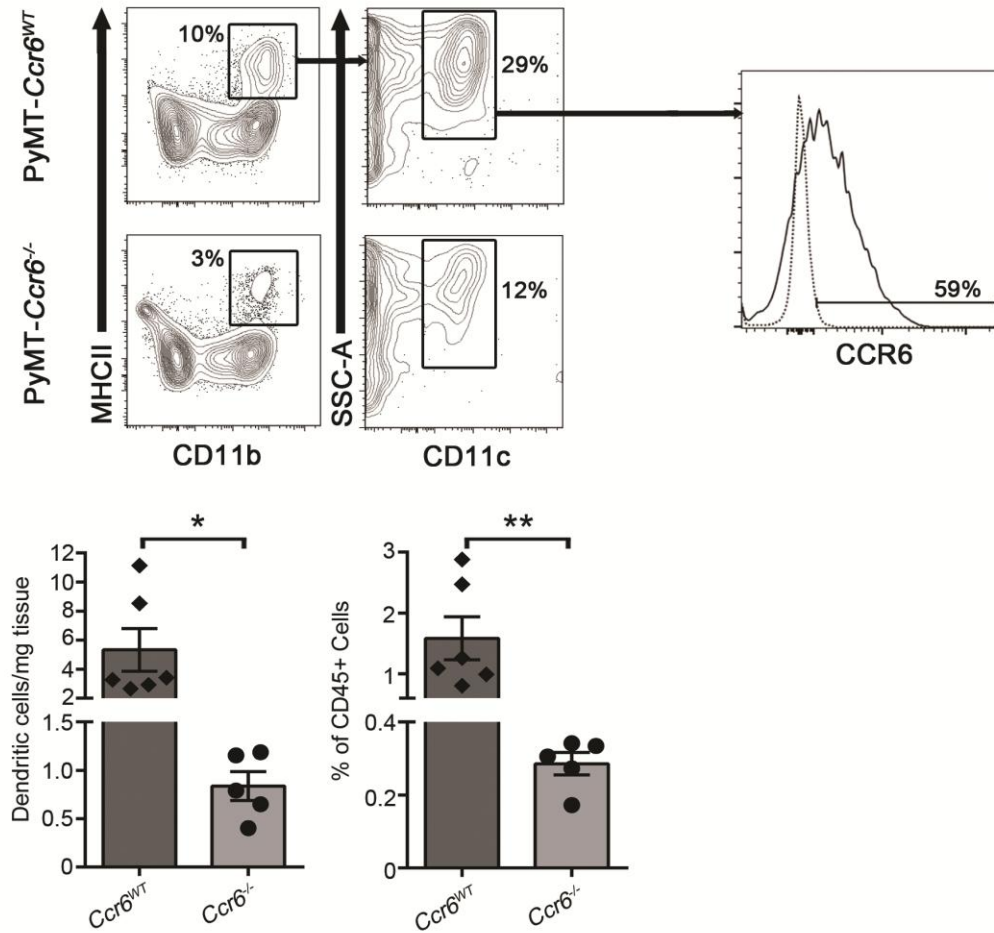

**Figure S3: Infiltrating dendritic cells in MMTV-PyMT *Ccr6*<sup>WT</sup> and *Ccr6*<sup>-/-</sup> mammary tumors as determined by flow cytometry**

All cells were gated for CD45<sup>+</sup>. MMTV-PyMT *Ccr6*<sup>WT</sup> dendritic cells were assessed for CCR6 expression (right), and proportions and numbers of dendritic cells compared between MMTV-PyMT *Ccr6*<sup>WT</sup> and *Ccr6*<sup>-/-</sup> (bottom). Dotted line=FMO control. n= 5-7 mice per genotype.

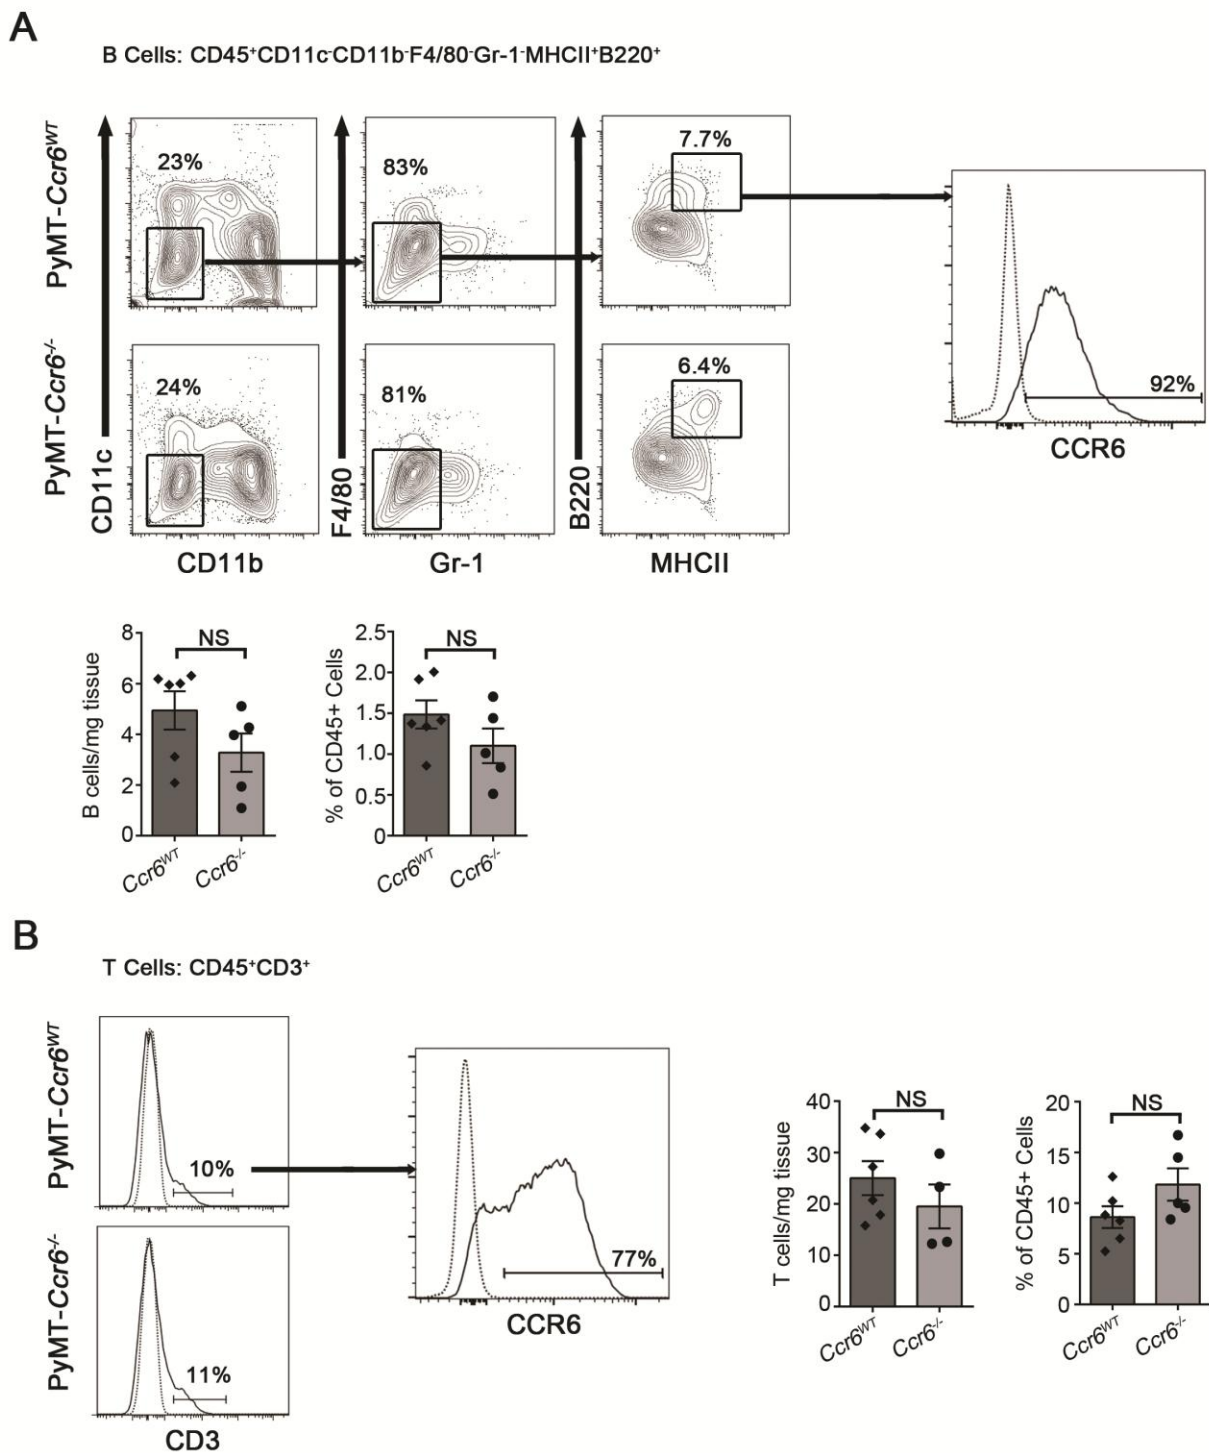

**Figure S4: Infiltrating B and T immune cells in MMTV-PyMT *Ccr6*<sup>WT</sup> and *Ccr6*<sup>-/-</sup> mammary tumors as determined by flow cytometry**

All cells were gated for CD45<sup>+</sup>. (a) MMTV-PyMT *Ccr6*<sup>WT</sup> B cells were assessed for CCR6 expression (right), and proportions and numbers of B cells compared between MMTV-PyMT *Ccr6*<sup>WT</sup> and *Ccr6*<sup>-/-</sup> (bottom). (b) MMTV-PyMT *Ccr6*<sup>WT</sup> T cells were assessed for CCR6 expression (middle), and proportions and numbers of T cells compared between MMTV-PyMT *Ccr6*<sup>WT</sup> and *Ccr6*<sup>-/-</sup> (right). Dotted lines=FMO controls. n= 5-7 mice per genotype.

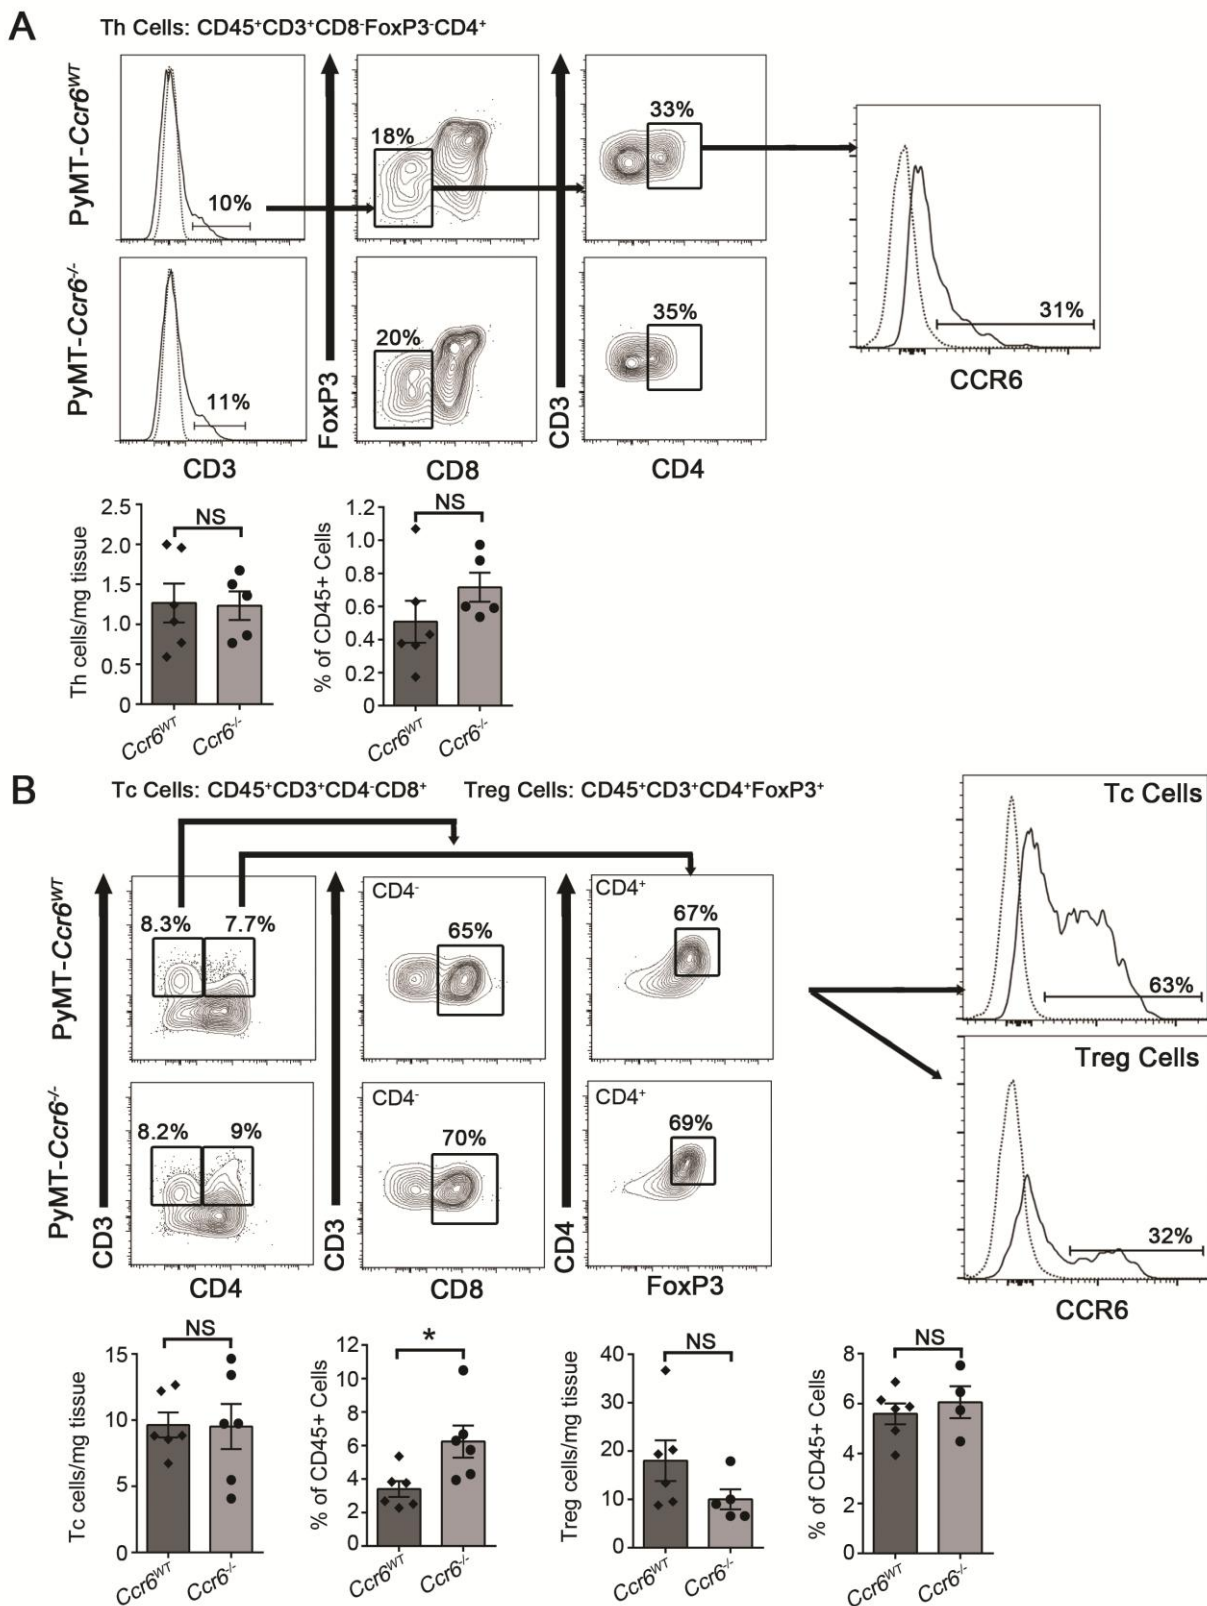

**Figure S5: Infiltrating T cell subsets in MMTV-PyMT *Ccr6*<sup>WT</sup> and *Ccr6*<sup>-/-</sup> mammary tumors as determined by flow cytometry**

All cells were gated for  $CD45^+$ . **(a)** MMTV-PyMT *Ccr6*<sup>WT</sup> helper T cells (Th) were assessed for CCR6 expression (right), and proportions and numbers of Th cells compared between MMTV-PyMT *Ccr6*<sup>WT</sup> and *Ccr6*<sup>-/-</sup> (bottom). **(b)** MMTV-PyMT *Ccr6*<sup>WT</sup> cytotoxic T cells (Tc) and regulatory T cells (Treg) were assessed for CCR6 expression (right), and proportions and numbers of Tc/Treg cells compared between MMTV-PyMT *Ccr6*<sup>WT</sup> and *Ccr6*<sup>-/-</sup> (bottom). Dotted lines=FMO controls. n= 5-7 mice per genotype.
